# Supplementary material for: A Pilot Metabolomic Study on Myocardial Injury Caused by Chronic Alcohol Consumption—Alcoholic Cardiomyopathy
Source: MDPI journal article supplement (doi:10.3390/molecules26082177), 2021-04-09
Supplement: s1 [file s1]

**Table S1.** The main KEGG pathways based on the differentially expressed metabolites in positive mode.

| Name                     | FC    | P value | ROC   | VIP   | Trend | KEGG pathway                                                                                                                                           |
|--------------------------|-------|---------|-------|-------|-------|--------------------------------------------------------------------------------------------------------------------------------------------------------|
| Adrenic acid             | 0.465 | 0.000   | 1.000 | 1.936 | down  | Ferroptosis; Biosynthesis of unsaturated fatty acids                                                                                                   |
| 16(R)-HETE               | 0.468 | 0.000   | 0.960 | 1.781 | down  | Arachidonic acid metabolism                                                                                                                            |
| Thiamine monophosphate   | 0.519 | 0.000   | 1.000 | 1.883 | down  | Thiamine metabolism                                                                                                                                    |
| Pantothenic acid         | 0.585 | 0.000   | 0.990 | 2.015 | down  | Vitamin digestion and absorption; Pantothenate and CoA biosynthesis                                                                                    |
| Xanthine                 | 0.595 | 0.000   | 0.960 | 1.799 | down  | Caffeine metabolism; Purine metabolism                                                                                                                 |
| 4-Oxoretinol             | 0.646 | 0.001   | 0.910 | 1.612 | down  | Retinol metabolism                                                                                                                                     |
| Pantetheine              | 0.675 | 0.005   | 0.880 | 1.434 | down  | Pantothenate and CoA biosynthesis                                                                                                                      |
| Thymine                  | 0.708 | 0.032   | 0.940 | 1.194 | down  | Pyrimidine metabolism                                                                                                                                  |
| Phenylacetyl glycine     | 0.727 | 0.032   | 0.800 | 1.144 | down  | Phenylalanine metabolism                                                                                                                               |
| Nicotinamide             | 0.753 | 0.000   | 0.950 | 1.768 | down  | Vitamin digestion and absorption; Nicotinate and nicotinamide metabolism                                                                               |
| Cytidine                 | 0.756 | 0.000   | 0.990 | 1.819 | down  | Pyrimidine metabolism                                                                                                                                  |
| D-Phenylalanine          | 0.780 | 0.042   | 0.810 | 1.107 | down  | Phenylalanine metabolism                                                                                                                               |
| Riboflavin               | 0.788 | 0.001   | 0.920 | 1.588 | down  | Riboflavin metabolism; Vitamin digestion and absorption                                                                                                |
| GDP                      | 0.821 | 0.004   | 0.880 | 1.434 | down  | RNA transport; Ras signaling pathway; Rap1 signaling pathway; Endocytosis                                                                              |
| UDP                      | 1.470 | 0.001   | 0.920 | 1.605 | up    | Pyrimidine metabolism                                                                                                                                  |
| NAD <sup>+</sup>         | 1.472 | 0.032   | 0.740 | 1.119 | up    | Vitamin digestion and absorption; Longevity regulating pathway; Oxidative phosphorylation; Thiamine metabolism; Nicotinate and nicotinamide metabolism |
| $\alpha$ -Linolenic acid | 1.493 | 0.001   | 0.880 | 1.587 | up    | Biosynthesis of unsaturated fatty acids; $\alpha$ -Linolenic acid metabolism                                                                           |
| Traumatic acid           | 1.561 | 0.035   | 0.730 | 1.151 | up    | $\alpha$ -Linolenic acid metabolism                                                                                                                    |

**Table S2.** The main KEGG pathways based on the differentially expressed metabolites in negative mode.

| Name                           | FC    | P<br>value | ROC   | VIP   | Trend | KEGG pathway                                                                                                                                                                                                                                                                                                                                                                                                                                                          |
|--------------------------------|-------|------------|-------|-------|-------|-----------------------------------------------------------------------------------------------------------------------------------------------------------------------------------------------------------------------------------------------------------------------------------------------------------------------------------------------------------------------------------------------------------------------------------------------------------------------|
| Docosapentaenoic acid          | 0.451 | 0.000      | 1.000 | 2.054 | down  | Biosynthesis of unsaturated fatty acids                                                                                                                                                                                                                                                                                                                                                                                                                               |
| Docosahexaenoic acid           | 0.514 | 0.000      | 1.000 | 1.910 | down  | Biosynthesis of unsaturated fatty acids                                                                                                                                                                                                                                                                                                                                                                                                                               |
| Mevalonic acid                 | 0.556 | 0.000      | 0.940 | 1.652 | down  | Terpenoid backbone biosynthesis; Ferroptosis                                                                                                                                                                                                                                                                                                                                                                                                                          |
| Arachidonic acid               | 0.603 | 0.000      | 1.000 | 1.807 | down  | Oxytocin signaling pathway; Necroptosis; Platelet activation; Fc epsilon RI signaling pathway; Fc gamma R-mediated phagocytosis; Retrograde endocannabinoid signaling; Long-term depression; GnRH signaling pathway; Linoleic acid metabolism; Vascular smooth muscle contraction; Inflammatory mediator regulation of TRP channels; Ferroptosis; Aldosterone synthesis and secretion; Biosynthesis of unsaturated fatty acids; Regulation of lipolysis in adipocytes |
| D-Mannitol 1-phosphate         | 0.673 | 0.000      | 0.960 | 1.848 | down  | Fructose and mannose metabolism                                                                                                                                                                                                                                                                                                                                                                                                                                       |
| Galactinol                     | 0.695 | 0.016      | 0.780 | 1.211 | down  | Galactose metabolism                                                                                                                                                                                                                                                                                                                                                                                                                                                  |
| Sedoheptulose 1,7-bisphosphate | 0.728 | 0.004      | 0.870 | 1.415 | down  | Carbon metabolism                                                                                                                                                                                                                                                                                                                                                                                                                                                     |
| XMP                            | 0.752 | 0.005      | 0.870 | 1.351 | down  | Purine metabolism                                                                                                                                                                                                                                                                                                                                                                                                                                                     |
| D-Ribulose 5-phosphate         | 0.786 | 0.001      | 0.890 | 1.574 | down  | Riboflavin metabolism; Pentose and glucuronate interconversions; Carbon metabolism; Pentose phosphate pathway                                                                                                                                                                                                                                                                                                                                                         |
| D-Sedoheptulose 7-phosphate    | 0.787 | 0.003      | 0.880 | 1.382 | down  | Pentose phosphate pathway; Carbon metabolism                                                                                                                                                                                                                                                                                                                                                                                                                          |
| Adenylosuccinic acid           | 0.820 | 0.017      | 0.790 | 1.238 | down  | Purine metabolism; Alanine, aspartate and glutamate metabolism                                                                                                                                                                                                                                                                                                                                                                                                        |
| 5-Aminovaleric acid            | 1.209 | 0.003      | 0.870 | 1.415 | up    | Lysine degradation                                                                                                                                                                                                                                                                                                                                                                                                                                                    |
| alpha-Ketoglutaric acid        | 1.211 | 0.025      | 0.780 | 1.147 | up    | Alanine, aspartate and glutamate metabolism; Butanoate metabolism; Glyoxylate and dicarboxylate metabolism; Pentose and glucuronate interconversions; D-Glutamine and D-glutamate metabolism                                                                                                                                                                                                                                                                          |
| Stearic acid                   | 1.225 | 0.000      | 0.970 | 1.646 | up    | Biosynthesis of unsaturated fatty acids; Fatty acid biosynthesis                                                                                                                                                                                                                                                                                                                                                                                                      |
| Dulcitol                       | 1.286 | 0.004      | 0.860 | 1.368 | up    | Galactose metabolism                                                                                                                                                                                                                                                                                                                                                                                                                                                  |
| Decanoic acid                  | 1.430 | 0.030      | 0.720 | 1.088 | up    | Fatty acid biosynthesis                                                                                                                                                                                                                                                                                                                                                                                                                                               |
| Arachidic acid                 | 1.454 | 0.001      | 0.900 | 1.461 | up    | Biosynthesis of unsaturated fatty acids                                                                                                                                                                                                                                                                                                                                                                                                                               |

|                                      |       |       |       |       |    |                                                                                                                                                                                                                                                                                                                                                                         |
|--------------------------------------|-------|-------|-------|-------|----|-------------------------------------------------------------------------------------------------------------------------------------------------------------------------------------------------------------------------------------------------------------------------------------------------------------------------------------------------------------------------|
| Nicotinamide<br>adenine dinucleotide | 1.465 | 0.020 | 0.850 | 1.217 | up | Thiamine metabolism; AMPK signaling<br>pathway; Longevity regulating pathway;<br>Aldosterone synthesis and secretion;<br>Oxidative phosphorylation                                                                                                                                                                                                                      |
| Cyclic ADP-ribose                    | 1.484 | 0.011 | 0.890 | 1.287 | up | Salivary secretion; Pancreatic secretion;<br>Oxytocin signaling pathway                                                                                                                                                                                                                                                                                                 |
| Calcitriol                           | 1.520 | 0.016 | 0.780 | 1.164 | up | Steroid biosynthesis; Endocrine and other<br>factor-regulated calcium reabsorption;<br>Mineral absorption; Tuberculosis                                                                                                                                                                                                                                                 |
| Adenosine 5'-<br>monophosphate       | 1.523 | 0.006 | 0.810 | 1.356 | up | AMPK signaling pathway; Longevity<br>regulating pathway; Aldosterone synthesis<br>and secretion; Antifolate resistance; FoxO<br>signaling pathway; mTOR signaling pathway;<br>PI3K-Akt signaling pathway; Olfactory<br>transduction; Taste transduction; cGMP-PKG<br>signaling pathway; Renin secretion; Purine<br>metabolism; Regulation of lipolysis in<br>adipocytes |
| Palmitic acid                        | 1.529 | 0.048 | 0.760 | 1.046 | up | Biosynthesis of unsaturated fatty acids; Fatty<br>acid biosynthesis; Fatty acid metabolism;<br>Fatty acid elongation                                                                                                                                                                                                                                                    |
| Succinic acid                        | 1.909 | 0.003 | 0.860 | 1.377 | up | Propanoate metabolism; Sulfur metabolism;<br>Oxidative phosphorylation; Alanine, aspartate<br>and glutamate metabolism; Butanoate<br>metabolism; Glyoxylate and dicarboxylate<br>metabolism                                                                                                                                                                             |
| Xanthurenic acid                     | 3.031 | 0.000 | 1.000 | 2.001 | up | Tryptophan metabolism                                                                                                                                                                                                                                                                                                                                                   |
| L-Fucose                             | 8.029 | 0.000 | 1.000 | 2.161 | up | Fructose and mannose metabolism                                                                                                                                                                                                                                                                                                                                         |

---
